# Supplementary material
Source: PubMed Central journal article supplement (PMC3092200)
Supplement: supp_1947601910369817_DS_10.1177_1947601910369817_Bettayeb_TableS1.pdf [file supp_1947601910369817_DS_10.1177_1947601910369817_Bettayeb_TableS1.pdf]

**Supplementary Table S1. CDK9/cyclin T - (S)-CR8 co-crystal structure.** Statistics of the dataset used and of the refined structures.

| <b>Data collection</b>                       | <b>CDK9/cyclin T1/ (S)-CR-8</b>                                      |
|----------------------------------------------|----------------------------------------------------------------------|
| Beam line                                    | Diamond I-02                                                         |
|                                              | H3                                                                   |
| Space group & unit cell (Å)                  | a=b=173.25 ; c=99.24<br>$\alpha=\beta=90^\circ$ ; $\gamma=120^\circ$ |
| Resolution (highest resolution shell) (Å)    | 50.01-3.00 (3.14-3.00)                                               |
| Total observations                           | 76157 (11267)                                                        |
| Unique                                       | 21867 (3222)                                                         |
| $R_{\text{merge}}$                           | 0.074 (0.542)                                                        |
| Multiplicity                                 | 3.5 (3.5)                                                            |
| Mean I/ $\sigma(I)$                          | 9.7 (2.1)                                                            |
| Completeness                                 | 98.4% (99.3%)                                                        |
| <b>Refinement Statistics</b>                 |                                                                      |
| (highest resolution shell) (Å)               | (3.14-3.00)                                                          |
| Total number of atoms                        | 4589                                                                 |
| Number of waters                             | 9                                                                    |
| R                                            | 16.23 (26.99)                                                        |
| $R_{\text{free}}$ (highest resolution shell) | 21.47 (33.57)                                                        |
| Rms bonds                                    | 0.009                                                                |
| Rms angles                                   | 1.153                                                                |
| Coordinates, pdb file #                      | 3LQ5                                                                 |
